# Supplementary material for: The Variability of the Order Burkholderiales Representatives in the Healthcare Units
Source: Hindawi journal article supplement (doi:10.1155/2015/680210), 2015-01-01
Supplement: f1 [file 680210.f1.pdf]

S1. The genomes of the order Burkholderiales (taxid:80840) in the NCBI Genome List (<http://www.ncbi.nlm.nih.gov/genome/browse/>) 05-09-2014

| N   | Organism/Name                              | Kingdom  | Group          | SubGroup           | Size (Mb) | Chr | Plasmids | Assemblies |
|-----|--------------------------------------------|----------|----------------|--------------------|-----------|-----|----------|------------|
| 1.  | Burkholderiales bacterium JGI 0001003-L21  | Bacteria | Proteobacteria | Betaproteobacteria | 0,070281  | -   | -        | 1          |
| 2.  | Comamonadaceae bacterium JGI 0001003-E14   | Bacteria | Proteobacteria | Betaproteobacteria | 0,113075  | -   | -        | 1          |
| 3.  | Candidatus Zinderia insecticola            | Bacteria | Proteobacteria | Betaproteobacteria | 0,208564  | 1   | -        | 1          |
| 4.  | Comamonadaceae bacterium JGI 0001013-A16   | Bacteria | Proteobacteria | Betaproteobacteria | 0,295955  | -   | -        | 1          |
| 5.  | Oxalobacteraceae bacterium JGI 0001004-J12 | Bacteria | Proteobacteria | Betaproteobacteria | 0,301938  | -   | -        | 1          |
| 6.  | Oxalobacteraceae bacterium JGI 0001002-K6  | Bacteria | Proteobacteria | Betaproteobacteria | 0,368093  | -   | -        | 1          |
| 7.  | Burkholderiales bacterium JGI 0001003-J08  | Bacteria | Proteobacteria | Betaproteobacteria | 0,394907  | -   | -        | 1          |
| 8.  | Burkholderiales bacterium JGI 0001002-H06  | Bacteria | Proteobacteria | Betaproteobacteria | 0,415398  | -   | -        | 1          |
| 9.  | Pelomonas                                  | Bacteria | Proteobacteria | Betaproteobacteria | 0,507844  | -   | -        | 2          |
| 10. | Leptothrix ochracea                        | Bacteria | Proteobacteria | Betaproteobacteria | 0,510792  | -   | -        | 1          |
| 11. | Oxalobacteraceae bacterium JGI 0001012-C15 | Bacteria | Proteobacteria | Betaproteobacteria | 0,640975  | -   | -        | 1          |
| 12. | Burkholderiales bacterium JGI 0001003-A5   | Bacteria | Proteobacteria | Betaproteobacteria | 0,686115  | -   | -        | 1          |
| 13. | Oxalobacteraceae bacterium JGI 001010-B17  | Bacteria | Proteobacteria | Betaproteobacteria | 0,825556  | -   | -        | 1          |
| 14. | Rhizobacter                                | Bacteria | Proteobacteria | Betaproteobacteria | 1,05799   | -   | -        | 2          |
| 15. | Taylorella asinigenitalis                  | Bacteria | Proteobacteria | Betaproteobacteria | 1,63856   | 1   | -        | 3          |
| 16. | Candidatus Glomeribacter gigasporarum      | Bacteria | Proteobacteria | Betaproteobacteria | 1,72695   | -   | -        | 1          |
| 17. | Taylorella equigenitalis                   | Bacteria | Proteobacteria | Betaproteobacteria | 1,73212   | 1   | -        | 3          |
| 18. | Brackiella oedipodis                       | Bacteria | Proteobacteria | Betaproteobacteria | 1,9221    | -   | -        | 1          |
| 19. | Basilea psittacipulmonis DSM 24701         | Bacteria | Proteobacteria | Betaproteobacteria | 1,95907   | 1   | -        | 1          |
| 20. | Polynucleobacter necessarius               | Bacteria | Proteobacteria | Betaproteobacteria | 2,15949   | 1   | -        | 2          |
| 21. | Oligella urethralis                        | Bacteria | Proteobacteria | Betaproteobacteria | 2,31161   | -   | -        | 1          |
| 22. | Sutterella parvirubra                      | Bacteria | Proteobacteria | Betaproteobacteria | 2,3769    | -   | -        | 1          |
| 23. | Oxalobacter formigenes                     | Bacteria | Proteobacteria | Betaproteobacteria | 2,48839   | -   | -        | 2          |

|     |                                            |          |                |                    |         |   |   |    |
|-----|--------------------------------------------|----------|----------------|--------------------|---------|---|---|----|
| 24. | Comamonadaceae bacterium H1                | Bacteria | Proteobacteria | Betaproteobacteria | 2,49225 | - | 1 | 1  |
| 25. | Brachymonas chironomi                      | Bacteria | Proteobacteria | Betaproteobacteria | 2,50356 | - | - | 1  |
| 26. | Pelistega                                  | Bacteria | Proteobacteria | Betaproteobacteria | 2,50491 | - | - | 1  |
| 27. | Oxalobacteraceae bacterium JGI 0001004-K23 | Bacteria | Proteobacteria | Betaproteobacteria | 2,57348 | - | - | 1  |
| 28. | Glomeribacter sp. 1016415                  | Bacteria | Proteobacteria | Betaproteobacteria | 2,63764 | - | - | 1  |
| 29. | Burkholderiales bacterium 1_1_47           | Bacteria | Proteobacteria | Betaproteobacteria | 2,65565 | - | - | 1  |
| 30. | Oligella ureolytica                        | Bacteria | Proteobacteria | Betaproteobacteria | 2,6683  | - | - | 1  |
| 31. | Parasutterella excrementihominis           | Bacteria | Proteobacteria | Betaproteobacteria | 2,8317  | - | - | 1  |
| 32. | Sutterella wadsworthensis                  | Bacteria | Proteobacteria | Betaproteobacteria | 2,98833 | - | - | 3  |
| 33. | Candidatus Symbiobacter mobilis CR         | Bacteria | Proteobacteria | Betaproteobacteria | 2,99184 | 1 | - | 1  |
| 34. | Alicyclophilus                             | Bacteria | Proteobacteria | Betaproteobacteria | 3,00778 | - | - | 1  |
| 35. | Lautropia mirabilis                        | Bacteria | Proteobacteria | Betaproteobacteria | 3,15192 | - | - | 1  |
| 36. | Herminiimonas                              | Bacteria | Proteobacteria | Betaproteobacteria | 3,38088 | - | - | 1  |
| 37. | Limnobacter                                | Bacteria | Proteobacteria | Betaproteobacteria | 3,39027 | - | - | 1  |
| 38. | Limnohabitans                              | Bacteria | Proteobacteria | Betaproteobacteria | 3,41171 | - | - | 2  |
| 39. | Herminiimonas arsenicoxydans               | Bacteria | Proteobacteria | Betaproteobacteria | 3,42431 | 1 | - | 1  |
| 40. | Thiomonas intermedia                       | Bacteria | Proteobacteria | Betaproteobacteria | 3,4621  | 1 | 2 | 1  |
| 41. | Comamonas granuli                          | Bacteria | Proteobacteria | Betaproteobacteria | 3,50599 | - | - | 1  |
| 42. | Caldimonas manganoxidans                   | Bacteria | Proteobacteria | Betaproteobacteria | 3,53212 | - | - | 1  |
| 43. | Simplicispira psychrophila                 | Bacteria | Proteobacteria | Betaproteobacteria | 3,60077 | - | - | 1  |
| 44. | Comamonas badia                            | Bacteria | Proteobacteria | Betaproteobacteria | 3,68102 | - | - | 1  |
| 45. | Bordetella avium                           | Bacteria | Proteobacteria | Betaproteobacteria | 3,73225 | 1 | - | 1  |
| 46. | Burkholderia rhizoxinica                   | Bacteria | Proteobacteria | Betaproteobacteria | 3,75014 | 1 | 2 | 1  |
| 47. | Bordetella holmesii                        | Bacteria | Proteobacteria | Betaproteobacteria | 3,76689 | 1 | - | 19 |

|     |                                     |          |                |                    |         |   |   |    |
|-----|-------------------------------------|----------|----------------|--------------------|---------|---|---|----|
| 48. | Thiomonas arsenitoxydans            | Bacteria | Proteobacteria | Betaproteobacteria | 3,78553 | 1 | 1 | 1  |
| 49. | Acidovorax ebreus                   | Bacteria | Proteobacteria | Betaproteobacteria | 3,79657 | 1 | - | 1  |
| 50. | Hylemonella gracilis                | Bacteria | Proteobacteria | Betaproteobacteria | 3,82161 | - | - | 2  |
| 51. | Pusillimonas noertemanni            | Bacteria | Proteobacteria | Betaproteobacteria | 3,91698 | - | - | 1  |
| 52. | Pusillimonas                        | Bacteria | Proteobacteria | Betaproteobacteria | 3,92481 | 1 | 1 | 1  |
| 53. | Castellaniella defragrans           | Bacteria | Proteobacteria | Betaproteobacteria | 3,95282 | 1 | - | 1  |
| 54. | Comamonas aquatica                  | Bacteria | Proteobacteria | Betaproteobacteria | 3,95606 | - | - | 2  |
| 55. | Candidatus Burkholderia kirkii      | Bacteria | Proteobacteria | Betaproteobacteria | 4,00944 | - | - | 1  |
| 56. | Ramlibacter tataouinensis           | Bacteria | Proteobacteria | Betaproteobacteria | 4,07019 | 1 | - | 1  |
| 57. | Bordetella                          | Bacteria | Proteobacteria | Betaproteobacteria | 4,07972 | - | - | 1  |
| 58. | Bordetella pertussis                | Bacteria | Proteobacteria | Betaproteobacteria | 4,15026 | 1 | 1 | 40 |
| 59. | Rubrivivax benzoatilyticus          | Bacteria | Proteobacteria | Betaproteobacteria | 4,16007 | - | - | 2  |
| 60. | Herbaspirillum massiliense          | Bacteria | Proteobacteria | Betaproteobacteria | 4,18827 | - | - | 1  |
| 61. | Alcaligenes faecalis                | Bacteria | Proteobacteria | Betaproteobacteria | 4,24831 | - | - | 3  |
| 62. | Rhodoferax saidenbachensis ED16     | Bacteria | Proteobacteria | Betaproteobacteria | 4,24939 | - | - | 1  |
| 63. | Thiomonas                           | Bacteria | Proteobacteria | Betaproteobacteria | 4,38846 | - | - | 2  |
| 64. | Methylibium                         | Bacteria | Proteobacteria | Betaproteobacteria | 4,44942 | - | - | 2  |
| 65. | Bordetella trematum                 | Bacteria | Proteobacteria | Betaproteobacteria | 4,46463 | - | - | 1  |
| 66. | Oxalobacteraceae bacterium IMCC9480 | Bacteria | Proteobacteria | Betaproteobacteria | 4,5015  | - | - | 1  |
| 67. | Sphaerotilus natans                 | Bacteria | Proteobacteria | Betaproteobacteria | 4,59282 | - | - | 1  |
| 68. | Comamonas composti                  | Bacteria | Proteobacteria | Betaproteobacteria | 4,63407 | - | - | 1  |
| 69. | Methylibium petroleiphilum          | Bacteria | Proteobacteria | Betaproteobacteria | 4,64364 | 1 | 1 | 1  |
| 70. | Verminephrobacter aporrectodeae     | Bacteria | Proteobacteria | Betaproteobacteria | 4,6818  | - | - | 1  |
| 71. | Advenella mimigardefordensis        | Bacteria | Proteobacteria | Betaproteobacteria | 4,76413 | 1 | 1 | 1  |

|     |                                      |          |                |                    |         |   |   |   |
|-----|--------------------------------------|----------|----------------|--------------------|---------|---|---|---|
| 72. | <i>Acidovorax delafieldii</i>        | Bacteria | Proteobacteria | Betaproteobacteria | 4,84209 | - | - | 1 |
| 73. | <i>Advenella kashmirensis</i>        | Bacteria | Proteobacteria | Betaproteobacteria | 4,84603 | 1 | 1 | 2 |
| 74. | <i>Bordetella parapertussis</i>      | Bacteria | Proteobacteria | Betaproteobacteria | 4,89957 | 1 | 1 | 2 |
| 75. | Comamonadaceae bacterium URHA0028    | Bacteria | Proteobacteria | Betaproteobacteria | 4,90412 | - | - | 1 |
| 76. | <i>Herbaspirillum lusitanum</i>      | Bacteria | Proteobacteria | Betaproteobacteria | 4,90487 | - | - | 1 |
| 77. | <i>Leptothrix cholodnii</i>          | Bacteria | Proteobacteria | Betaproteobacteria | 4,9094  | 1 | - | 1 |
| 78. | <i>Ideonella</i>                     | Bacteria | Proteobacteria | Betaproteobacteria | 4,93675 | - | - | 1 |
| 79. | <i>Rhodoferax ferrireducens</i>      | Bacteria | Proteobacteria | Betaproteobacteria | 4,96978 | 1 | 1 | 1 |
| 80. | <i>Rubrivivax gelatinosus</i>        | Bacteria | Proteobacteria | Betaproteobacteria | 5,04325 | 1 | - | 2 |
| 81. | <i>Alicyclophilus denitrificans</i>  | Bacteria | Proteobacteria | Betaproteobacteria | 5,07075 | 1 | 2 | 2 |
| 82. | <i>Hydrogenophaga</i>                | Bacteria | Proteobacteria | Betaproteobacteria | 5,14453 | - | - | 2 |
| 83. | <i>Derxia gummosa</i>                | Bacteria | Proteobacteria | Betaproteobacteria | 5,18517 | - | - | 1 |
| 84. | <i>Collimonas fungivorans</i>        | Bacteria | Proteobacteria | Betaproteobacteria | 5,1869  | 1 | 1 | 1 |
| 85. | <i>Comamonas</i>                     | Bacteria | Proteobacteria | Betaproteobacteria | 5,24376 | - | 1 | 1 |
| 86. | <i>Polaromonas glacialis</i>         | Bacteria | Proteobacteria | Betaproteobacteria | 5,28404 | - | - | 1 |
| 87. | <i>Bordetella petrii</i>             | Bacteria | Proteobacteria | Betaproteobacteria | 5,28795 | 1 | - | 3 |
| 88. | <i>Hydrogenophaga intermedia</i>     | Bacteria | Proteobacteria | Betaproteobacteria | 5,28813 | - | - | 1 |
| 89. | <i>Massilia consociata</i>           | Bacteria | Proteobacteria | Betaproteobacteria | 5,32616 | - | - | 1 |
| 90. | <i>Acidovorax citrulli</i>           | Bacteria | Proteobacteria | Betaproteobacteria | 5,35277 | 1 | - | 2 |
| 91. | <i>Polaromonas naphthalenivorans</i> | Bacteria | Proteobacteria | Betaproteobacteria | 5,36614 | 1 | 8 | 1 |
| 92. | <i>Herbaspirillum frisingense</i>    | Bacteria | Proteobacteria | Betaproteobacteria | 5,40833 | - | - | 1 |
| 93. | <i>Pandoraea pnomensua</i>           | Bacteria | Proteobacteria | Betaproteobacteria | 5,43513 | 1 | - | 2 |
| 94. | <i>Acidovorax avenae</i>             | Bacteria | Proteobacteria | Betaproteobacteria | 5,52228 | 1 | - | 2 |
| 95. | <i>Acidovorax oryzae</i>             | Bacteria | Proteobacteria | Betaproteobacteria | 5,52678 | - | - | 1 |

|      |                                          |          |                |                    |         |   |   |    |
|------|------------------------------------------|----------|----------------|--------------------|---------|---|---|----|
| 96.  | <i>Acidovorax radidis</i>                | Bacteria | Proteobacteria | Betaproteobacteria | 5,53023 | - | - | 2  |
| 97.  | <i>Chitinimonas koreensis</i>            | Bacteria | Proteobacteria | Betaproteobacteria | 5,5861  | - | - | 1  |
| 98.  | <i>Verminephrobacter eiseniae</i>        | Bacteria | Proteobacteria | Betaproteobacteria | 5,59794 | 1 | 1 | 1  |
| 99.  | Burkholderiales bacterium JOSHI_001      | Bacteria | Proteobacteria | Betaproteobacteria | 5,60063 | 1 | - | 1  |
| 100. | <i>Herbaspirillum seropedicae</i>        | Bacteria | Proteobacteria | Betaproteobacteria | 5,63315 | 1 | - | 2  |
| 101. | <i>Pseudacidovorax intermedius</i>       | Bacteria | Proteobacteria | Betaproteobacteria | 5,69128 | - | - | 1  |
| 102. | <i>Pandoraea</i>                         | Bacteria | Proteobacteria | Betaproteobacteria | 5,77201 | 1 | - | 5  |
| 103. | <i>Herbaspirillum huttiense</i>          | Bacteria | Proteobacteria | Betaproteobacteria | 5,77792 | - | - | 1  |
| 104. | <i>Massilia</i>                          | Bacteria | Proteobacteria | Betaproteobacteria | 5,79957 | - | - | 3  |
| 105. | <i>Bordetella bronchiseptica</i>         | Bacteria | Proteobacteria | Betaproteobacteria | 5,83141 | 1 | - | 62 |
| 106. | <i>Polaromonas</i>                       | Bacteria | Proteobacteria | Betaproteobacteria | 5,89868 | 1 | 2 | 3  |
| 107. | <i>Burkholderia mallei</i>               | Bacteria | Proteobacteria | Betaproteobacteria | 5,93808 | 2 | - | 16 |
| 108. | <i>Janthinobacterium agaricidamnosum</i> | Bacteria | Proteobacteria | Betaproteobacteria | 5,949   | 1 | - | 1  |
| 109. | <i>Ralstonia solanacearum</i>            | Bacteria | Proteobacteria | Betaproteobacteria | 5,96071 | 1 | 2 | 18 |
| 110. | <i>Comamonas testosteroni</i>            | Bacteria | Proteobacteria | Betaproteobacteria | 6,0627  | 1 | 4 | 7  |
| 111. | <i>Pseudoduganella violaceinigra</i>     | Bacteria | Proteobacteria | Betaproteobacteria | 6,11035 | - | - | 1  |
| 112. | <i>Massilia alkalitolerans</i>           | Bacteria | Proteobacteria | Betaproteobacteria | 6,11168 | - | - | 1  |
| 113. | <i>Massilia timonae</i>                  | Bacteria | Proteobacteria | Betaproteobacteria | 6,1365  | - | - | 1  |
| 114. | <i>Herbaspirillum rubrisubalbicans</i>   | Bacteria | Proteobacteria | Betaproteobacteria | 6,15299 | - | - | 1  |
| 115. | <i>Achromobacter arsenitoxydans</i>      | Bacteria | Proteobacteria | Betaproteobacteria | 6,15666 | - | - | 1  |
| 116. | <i>Burkholderia andropogonis</i>         | Bacteria | Proteobacteria | Betaproteobacteria | 6,17866 | - | - | 1  |
| 117. | <i>Janthinobacterium lividum</i>         | Bacteria | Proteobacteria | Betaproteobacteria | 6,21274 | - | - | 2  |
| 118. | <i>Duganella zoogloeoides</i>            | Bacteria | Proteobacteria | Betaproteobacteria | 6,27295 | - | - | 1  |
| 119. | <i>Herbaspirillum</i>                    | Bacteria | Proteobacteria | Betaproteobacteria | 6,28457 | - | - | 7  |

|      |                                  |          |                |                    |         |   |   |    |
|------|----------------------------------|----------|----------------|--------------------|---------|---|---|----|
| 120. | Burkholderia dolosa              | Bacteria | Proteobacteria | Betaproteobacteria | 6,4204  | 3 | - | 2  |
| 121. | Burkholderia acidipaludis        | Bacteria | Proteobacteria | Betaproteobacteria | 6,47543 | - | - | 1  |
| 122. | Xenophilus azovorans             | Bacteria | Proteobacteria | Betaproteobacteria | 6,53517 | - | - | 1  |
| 123. | Burkholderia ginsengisoli        | Bacteria | Proteobacteria | Betaproteobacteria | 6,54189 | - | - | 1  |
| 124. | Massilia niastensis              | Bacteria | Proteobacteria | Betaproteobacteria | 6,59449 | - | - | 1  |
| 125. | Variovorax                       | Bacteria | Proteobacteria | Betaproteobacteria | 6,63234 | - | 1 | 13 |
| 126. | Mitsuaria                        | Bacteria | Proteobacteria | Betaproteobacteria | 6,65505 | - | - | 1  |
| 127. | Burkholderia grimmiae            | Bacteria | Proteobacteria | Betaproteobacteria | 6,7043  | - | - | 1  |
| 128. | Delftia tsuruhatensis            | Bacteria | Proteobacteria | Betaproteobacteria | 6,73215 | - | - | 1  |
| 129. | Curvibacter gracilis             | Bacteria | Proteobacteria | Betaproteobacteria | 6,74824 | - | - | 1  |
| 130. | Delftia                          | Bacteria | Proteobacteria | Betaproteobacteria | 6,75271 | 1 | 1 | 4  |
| 131. | Ralstonia                        | Bacteria | Proteobacteria | Betaproteobacteria | 6,76618 | - | - | 9  |
| 132. | Cupriavidus taiwanensis          | Bacteria | Proteobacteria | Betaproteobacteria | 6,77177 | 2 | 2 | 3  |
| 133. | Curvibacter lanceolatus          | Bacteria | Proteobacteria | Betaproteobacteria | 6,83252 | - | - | 1  |
| 134. | Achromobacter piechaudii         | Bacteria | Proteobacteria | Betaproteobacteria | 6,8922  | - | - | 2  |
| 135. | Burkholderia ubonensis           | Bacteria | Proteobacteria | Betaproteobacteria | 6,93253 | - | - | 1  |
| 136. | Delftia acidovorans              | Bacteria | Proteobacteria | Betaproteobacteria | 6,95318 | 1 | 4 | 4  |
| 137. | Burkholderia multivorans         | Bacteria | Proteobacteria | Betaproteobacteria | 7,00881 | 3 | 1 | 7  |
| 138. | Oxalobacteraceae bacterium AB_14 | Bacteria | Proteobacteria | Betaproteobacteria | 7,02801 | - | - | 1  |
| 139. | Burkholderia oklahomensis        | Bacteria | Proteobacteria | Betaproteobacteria | 7,04716 | - | - | 2  |
| 140. | Ottowia thiooxydans              | Bacteria | Proteobacteria | Betaproteobacteria | 7,04872 | - | - | 1  |
| 141. | Acidovorax                       | Bacteria | Proteobacteria | Betaproteobacteria | 7,08623 | 1 | 2 | 7  |
| 142. | Janthinobacterium                | Bacteria | Proteobacteria | Betaproteobacteria | 7,11467 | 1 | - | 4  |
| 143. | Burkholderia kururiensis         | Bacteria | Proteobacteria | Betaproteobacteria | 7,12886 | - | - | 3  |

|      |                             |          |                |                    |         |   |   |    |
|------|-----------------------------|----------|----------------|--------------------|---------|---|---|----|
| 144. | Alcaligenes                 | Bacteria | Proteobacteria | Betaproteobacteria | 7,13895 | - | - | 3  |
| 145. | Burkholderia thailandensis  | Bacteria | Proteobacteria | Betaproteobacteria | 7,24599 | 2 | - | 12 |
| 146. | Cupriavidus pinatubonensis  | Bacteria | Proteobacteria | Betaproteobacteria | 7,25529 | 2 | 2 | 1  |
| 147. | Burkholderia caledonica     | Bacteria | Proteobacteria | Betaproteobacteria | 7,28235 | - | - | 1  |
| 148. | Burkholderia glumae         | Bacteria | Proteobacteria | Betaproteobacteria | 7,28464 | 2 | 4 | 5  |
| 149. | Cupriavidus metallidurans   | Bacteria | Proteobacteria | Betaproteobacteria | 7,29187 | 1 | 3 | 5  |
| 150. | Achromobacter xylosoxidans  | Bacteria | Proteobacteria | Betaproteobacteria | 7,35915 | 1 | 2 | 5  |
| 151. | Burkholderia bryophila      | Bacteria | Proteobacteria | Betaproteobacteria | 7,38182 | - | - | 1  |
| 152. | Burkholderia pseudomallei   | Bacteria | Proteobacteria | Betaproteobacteria | 7,45365 | 2 | 1 | 68 |
| 153. | Burkholderia graminis       | Bacteria | Proteobacteria | Betaproteobacteria | 7,47726 | - | - | 1  |
| 154. | Variovorax paradoxus        | Bacteria | Proteobacteria | Betaproteobacteria | 7,51589 | 2 | - | 5  |
| 155. | Burkholderia dilworthii     | Bacteria | Proteobacteria | Betaproteobacteria | 7,67907 | - | - | 1  |
| 156. | Burkholderia sprentiae      | Bacteria | Proteobacteria | Betaproteobacteria | 7,76106 | - | - | 1  |
| 157. | Burkholderia zhejiangensis  | Bacteria | Proteobacteria | Betaproteobacteria | 7,76722 | - | - | 1  |
| 158. | Burkholderia phenoliruptrix | Bacteria | Proteobacteria | Betaproteobacteria | 7,81103 | 2 | 1 | 2  |
| 159. | Burkholderia ambifaria      | Bacteria | Proteobacteria | Betaproteobacteria | 7,85547 | 3 | 1 | 4  |
| 160. | Cupriavidus                 | Bacteria | Proteobacteria | Betaproteobacteria | 7,89301 | - | - | 9  |
| 161. | Burkholderia ferrariae      | Bacteria | Proteobacteria | Betaproteobacteria | 7,93864 | - | - | 1  |
| 162. | Burkholderia heleaia        | Bacteria | Proteobacteria | Betaproteobacteria | 8,00747 | - | - | 1  |
| 163. | Burkholderia pyrrocinia     | Bacteria | Proteobacteria | Betaproteobacteria | 8,0497  | - | - | 2  |
| 164. | Burkholderia cenocepacia    | Bacteria | Proteobacteria | Betaproteobacteria | 8,05578 | 3 | 1 | 13 |
| 165. | Ralstonia pickettii         | Bacteria | Proteobacteria | Betaproteobacteria | 8,12585 | 3 | 3 | 7  |
| 166. | Burkholderia phytofirmans   | Bacteria | Proteobacteria | Betaproteobacteria | 8,21466 | 2 | 1 | 1  |
| 167. | Burkholderia vietnamiensis  | Bacteria | Proteobacteria | Betaproteobacteria | 8,39107 | 3 | 5 | 1  |

|      |                          |          |                |                    |         |   |   |    |
|------|--------------------------|----------|----------------|--------------------|---------|---|---|----|
| 168. | Cupriavidus basilensis   | Bacteria | Proteobacteria | Betaproteobacteria | 8,54679 | - | - | 2  |
| 169. | Burkholderia glathei     | Bacteria | Proteobacteria | Betaproteobacteria | 8,63738 | - | - | 1  |
| 170. | Burkholderia mimosarum   | Bacteria | Proteobacteria | Betaproteobacteria | 8,64028 | - | - | 3  |
| 171. | Burkholderia bannensis   | Bacteria | Proteobacteria | Betaproteobacteria | 8,64877 | - | - | 1  |
| 172. | Burkholderia lata        | Bacteria | Proteobacteria | Betaproteobacteria | 8,67628 | 3 | - | 1  |
| 173. | Burkholderia phymatum    | Bacteria | Proteobacteria | Betaproteobacteria | 8,67656 | 2 | 2 | 1  |
| 174. | Burkholderia fungorum    | Bacteria | Proteobacteria | Betaproteobacteria | 8,69621 | - | - | 1  |
| 175. | Azohydromonas australica | Bacteria | Proteobacteria | Betaproteobacteria | 8,78678 | - | - | 1  |
| 176. | Burkholderia cepacia     | Bacteria | Proteobacteria | Betaproteobacteria | 8,94713 | 2 | 3 | 5  |
| 177. | Burkholderia gladioli    | Bacteria | Proteobacteria | Betaproteobacteria | 9,0523  | 2 | 4 | 3  |
| 178. | Bordetella hinzii        | Bacteria | Proteobacteria | Betaproteobacteria | 9,13822 | - | - | 8  |
| 179. | Burkholderia caribensis  | Bacteria | Proteobacteria | Betaproteobacteria | 9,43603 | - | - | 1  |
| 180. | Burkholderia nodosa      | Bacteria | Proteobacteria | Betaproteobacteria | 9,62797 | - | - | 1  |
| 181. | Burkholderia xenovorans  | Bacteria | Proteobacteria | Betaproteobacteria | 9,73114 | 3 | - | 1  |
| 182. | Cupriavidus necator      | Bacteria | Proteobacteria | Betaproteobacteria | 9,74138 | 2 | 2 | 3  |
| 183. | Burkholderia sordidicola | Bacteria | Proteobacteria | Betaproteobacteria | 10,2619 | - | - | 1  |
| 184. | Burkholderia oxyphila    | Bacteria | Proteobacteria | Betaproteobacteria | 10,6477 | - | - | 1  |
| 185. | Burkholderia             | Bacteria | Proteobacteria | Betaproteobacteria | 10,9184 | 3 | 3 | 39 |
| 186. | Burkholderia terrae      | Bacteria | Proteobacteria | Betaproteobacteria | 11,2941 | - | - | 2  |



S2. Evolutionary divergence between nucleotide sequences of 17 STs.

The number of base differences per site from analysis between nucleotide sequences is shown. All results are based on the pairwise analysis of 17 sequences

|        | ST_28 | ST_241 | ST_728 | ST_709 | ST_714 | ST_208 | ST_708 | ST_727 | ST_862 | ST_710 | ST_878 | ST_711 | ST_712 | ST_835 | ST_51 | ST_102 | ST_729 |
|--------|-------|--------|--------|--------|--------|--------|--------|--------|--------|--------|--------|--------|--------|--------|-------|--------|--------|
| ST_28  |       |        |        |        |        |        |        |        |        |        |        |        |        |        |       |        |        |
| ST_241 | 0.003 |        |        |        |        |        |        |        |        |        |        |        |        |        |       |        |        |
| ST_728 | 0.003 | 0.002  |        |        |        |        |        |        |        |        |        |        |        |        |       |        |        |
| ST_709 | 0.005 | 0.004  | 0.003  |        |        |        |        |        |        |        |        |        |        |        |       |        |        |
| ST_714 | 0.002 | 0.003  | 0.003  | 0.004  |        |        |        |        |        |        |        |        |        |        |       |        |        |
| ST_208 | 0.004 | 0.003  | 0.003  | 0.004  | 0.002  |        |        |        |        |        |        |        |        |        |       |        |        |
| ST_708 | 0.004 | 0.003  | 0.003  | 0.003  | 0.004  | 0.003  |        |        |        |        |        |        |        |        |       |        |        |
| ST_727 | 0.021 | 0.021  | 0.020  | 0.020  | 0.019  | 0.019  | 0.019  |        |        |        |        |        |        |        |       |        |        |
| ST_862 | 0.022 | 0.022  | 0.021  | 0.022  | 0.020  | 0.021  | 0.021  | 0.008  |        |        |        |        |        |        |       |        |        |
| ST_710 | 0.022 | 0.022  | 0.022  | 0.022  | 0.021  | 0.021  | 0.020  | 0.008  | 0.009  |        |        |        |        |        |       |        |        |
| ST_878 | 0.023 | 0.023  | 0.022  | 0.022  | 0.021  | 0.022  | 0.021  | 0.009  | 0.010  | 0.005  |        |        |        |        |       |        |        |
| ST_711 | 0.057 | 0.057  | 0.056  | 0.057  | 0.056  | 0.056  | 0.057  | 0.056  | 0.058  | 0.058  | 0.058  |        |        |        |       |        |        |
| ST_712 | 0.058 | 0.058  | 0.057  | 0.058  | 0.057  | 0.057  | 0.058  | 0.056  | 0.058  | 0.059  | 0.060  | 0.003  |        |        |       |        |        |
| ST_835 | 0.060 | 0.060  | 0.060  | 0.060  | 0.058  | 0.058  | 0.059  | 0.058  | 0.061  | 0.060  | 0.061  | 0.011  | 0.011  |        |       |        |        |
| ST_51  | 0.051 | 0.052  | 0.051  | 0.051  | 0.050  | 0.051  | 0.051  | 0.047  | 0.049  | 0.049  | 0.048  | 0.065  | 0.066  | 0.068  |       |        |        |
| ST_102 | 0.037 | 0.038  | 0.038  | 0.037  | 0.037  | 0.037  | 0.038  | 0.040  | 0.040  | 0.040  | 0.040  | 0.065  | 0.066  | 0.067  | 0.054 |        |        |
| ST_729 | 0.060 | 0.061  | 0.060  | 0.058  | 0.059  | 0.059  | 0.059  | 0.056  | 0.058  | 0.058  | 0.058  | 0.063  | 0.064  | 0.066  | 0.066 | 0.063  |        |

S3. Evolutionary divergence between amino acid sequences of 17 STs.

The number of amino acid residues differences per site from analysis between sequences is shown. All results are based on the pairwise analysis of 17 sequences.

|        | ST_28 | ST_241 | ST_728 | ST_709 | ST_714 | ST_208 | ST_708 | ST_727 | ST_862 | ST_710 | ST_878 | ST_711 | ST_712 | ST_835 | ST_51 | ST_102 | ST_729 |
|--------|-------|--------|--------|--------|--------|--------|--------|--------|--------|--------|--------|--------|--------|--------|-------|--------|--------|
| ST_28  |       |        |        |        |        |        |        |        |        |        |        |        |        |        |       |        |        |
| ST_241 | 0.000 |        |        |        |        |        |        |        |        |        |        |        |        |        |       |        |        |
| ST_728 | 0.000 | 0.000  |        |        |        |        |        |        |        |        |        |        |        |        |       |        |        |
| ST_709 | 0.000 | 0.000  | 0.000  |        |        |        |        |        |        |        |        |        |        |        |       |        |        |
| ST_714 | 0.001 | 0.001  | 0.001  | 0.001  |        |        |        |        |        |        |        |        |        |        |       |        |        |
| ST_208 | 0.002 | 0.002  | 0.002  | 0.002  | 0.001  |        |        |        |        |        |        |        |        |        |       |        |        |
| ST_708 | 0.001 | 0.001  | 0.001  | 0.001  | 0.002  | 0.003  |        |        |        |        |        |        |        |        |       |        |        |
| ST_727 | 0.008 | 0.008  | 0.008  | 0.008  | 0.007  | 0.008  | 0.009  |        |        |        |        |        |        |        |       |        |        |
| ST_862 | 0.009 | 0.009  | 0.009  | 0.009  | 0.008  | 0.009  | 0.010  | 0.001  |        |        |        |        |        |        |       |        |        |
| ST_710 | 0.009 | 0.009  | 0.009  | 0.009  | 0.008  | 0.009  | 0.010  | 0.001  | 0.000  |        |        |        |        |        |       |        |        |
| ST_878 | 0.009 | 0.009  | 0.009  | 0.009  | 0.008  | 0.009  | 0.010  | 0.001  | 0.000  | 0.000  |        |        |        |        |       |        |        |
| ST_711 | 0.035 | 0.035  | 0.035  | 0.035  | 0.034  | 0.035  | 0.036  | 0.036  | 0.037  | 0.037  | 0.037  |        |        |        |       |        |        |
| ST_712 | 0.035 | 0.035  | 0.035  | 0.035  | 0.034  | 0.035  | 0.036  | 0.036  | 0.037  | 0.037  | 0.037  | 0.000  |        |        |       |        |        |
| ST_835 | 0.035 | 0.035  | 0.035  | 0.035  | 0.034  | 0.035  | 0.036  | 0.036  | 0.037  | 0.037  | 0.037  | 0.000  | 0.000  |        |       |        |        |
| ST_51  | 0.033 | 0.033  | 0.033  | 0.033  | 0.032  | 0.033  | 0.034  | 0.027  | 0.026  | 0.026  | 0.026  | 0.049  | 0.049  | 0.049  |       |        |        |
| ST_102 | 0.014 | 0.014  | 0.014  | 0.014  | 0.013  | 0.014  | 0.015  | 0.011  | 0.010  | 0.010  | 0.010  | 0.034  | 0.034  | 0.034  | 0.030 |        |        |
| ST_729 | 0.035 | 0.035  | 0.035  | 0.035  | 0.034  | 0.035  | 0.036  | 0.034  | 0.033  | 0.033  | 0.033  | 0.041  | 0.041  | 0.041  | 0.041 | 0.033  |        |





|                         |                         |                         |                         |             |             |             |             |             |             |            |            |            |            |            |            |            |            |
|-------------------------|-------------------------|-------------------------|-------------------------|-------------|-------------|-------------|-------------|-------------|-------------|------------|------------|------------|------------|------------|------------|------------|------------|
| 31                      | 30                      | 29                      | 28                      | 27          | 26          | 25          | 24          | 23          | 22          | 21         | 20         | 19         | 18         | 17         | 16         | 15         | 14         |
| Var_gltB_CP0<br>01635.1 | Aci_gltB_CP00<br>0512.1 | Ral_gltB_CP0<br>06667.1 | Ral_gltB_AL6<br>46052.1 | Ach_gltB_15 | Ach_gltB_14 | Ach_gltB_13 | Ach_gltB_12 | Ach_gltB_11 | Ach_gltB_10 | Ach_gltB_9 | Ach_gltB_8 | Ach_gltB_7 | Ach_gltB_6 | Ach_gltB_5 | Ach_gltB_4 | Ach_gltB_3 | Ach_gltB_2 |
| 31.9                    | 35.4                    | 27.5                    | 25.7                    | 30.3        | 29.9        | 30.7        | 30.3        | 31.0        | 30.7        | 29.9       | 31.4       | 30.3       | 30.7       | 29.6       | 30.7       | 31.4       | 30.3       |
| 31.2                    | 34.2                    | 26.4                    | 25.0                    | 29.9        | 29.6        | 30.3        | 29.9        | 30.7        | 30.3        | 29.6       | 31.0       | 29.9       | 30.3       | 29.2       | 30.3       | 31.1       | 30.0       |
| 31.5                    | 35.0                    | 27.1                    | 25.3                    | 28.5        | 28.8        | 28.8        | 28.5        | 29.9        | 28.8        | 28.1       | 29.6       | 28.5       | 29.6       | 28.5       | 28.8       | 30.3       | 29.2       |
| 31.2                    | 36.6                    | 30.1                    | 28.6                    | 30.7        | 30.7        | 31.0        | 30.7        | 31.4        | 31.0        | 30.3       | 31.8       | 30.7       | 31.1       | 30.3       | 31.0       | 31.8       | 30.7       |
| 31.5                    | 36.2                    | 30.1                    | 28.2                    | 30.3        | 30.3        | 30.7        | 30.3        | 31.1        | 30.7        | 29.9       | 31.4       | 30.3       | 30.7       | 29.9       | 30.7       | 31.5       | 30.3       |
| 32.3                    | 35.8                    | 27.8                    | 26.4                    | 30.7        | 30.3        | 31.0        | 30.7        | 31.4        | 31.0        | 30.3       | 31.8       | 30.7       | 31.1       | 29.9       | 31.0       | 31.8       | 30.7       |
| 31.5                    | 35.0                    | 28.2                    | 26.1                    | 30.7        | 30.7        | 31.1        | 30.7        | 32.2        | 31.1        | 30.3       | 31.8       | 30.7       | 31.9       | 30.3       | 31.1       | 32.6       | 31.5       |
| 31.9                    | 34.2                    | 27.1                    | 25.3                    | 29.9        | 29.6        | 30.3        | 29.9        | 30.7        | 30.3        | 29.5       | 31.0       | 29.9       | 30.3       | 29.2       | 30.3       | 31.1       | 29.9       |
| 31.9                    | 35.0                    | 27.1                    | 25.3                    | 29.9        | 29.6        | 30.3        | 29.9        | 30.7        | 30.3        | 29.6       | 31.0       | 29.9       | 30.3       | 29.2       | 30.3       | 31.1       | 30.0       |
| 31.5                    | 33.8                    | 26.8                    | 25.3                    | 29.6        | 29.2        | 29.9        | 29.6        | 30.3        | 29.9        | 29.2       | 30.7       | 29.6       | 30.0       | 28.8       | 29.9       | 30.7       | 29.6       |
| 31.5                    | 35.0                    | 27.8                    | 26.0                    | 30.7        | 30.3        | 31.0        | 30.7        | 31.4        | 31.0        | 30.3       | 31.8       | 30.7       | 31.1       | 29.9       | 31.0       | 31.8       | 30.7       |
| 31.5                    | 36.2                    | 29.7                    | 28.6                    | 31.1        | 30.3        | 31.4        | 31.1        | 30.3        | 31.4        | 30.7       | 32.2       | 31.1       | 29.9       | 29.2       | 31.4       | 30.7       | 29.5       |
| 34.5                    | 34.4                    | 34.2                    | 29.9                    | 4.2         | 3.4         | 4.7         | 4.2         | 0.8         | 4.4         | 5.0        | 5.0        | 4.2        | 0.8        | 2.3        | 4.4        | 1.0        | 0.3        |
| 34.1                    | 34.0                    | 33.8                    | 29.5                    | 3.9         | 3.1         | 4.5         | 3.9         | 0.5         | 4.2         | 4.7        | 4.7        | 3.9        | 0.5        | 2.1        | 4.2        | 0.8        | ***        |
| 35.3                    | 34.9                    | 34.1                    | 30.2                    | 4.7         | 3.90        | 5.30        | 4.70        | 0.3         | 5           | 5.5        | 5.5        | 4.7        | 1.3        | 2.9        | 5          | ***        | 99.3       |
| 35.7                    | 34.9                    | 35.0                    | 29.5                    | 1.3         | 2.60        | 1.30        | 0.80        | 4.7         | 1           | 1.5        | 1          | 0.8        | 4.7        | 2.6        | ***        | 95.4       | 96.1       |
| 33.4                    | 32.8                    | 33.4                    | 28.4                    | 2.3         | 2.60        | 2.80        | 2.30        | 2.6         | 2.6         | 3.1        | 3.1        | 2.3        | 2.6        | ***        | 97.6       | 97.3       | 98.1       |
| 34.9                    | 34.9                    | 34.6                    | 29.9                    | 4.4         | 3.60        | 5.00        | 4.40        | 1           | 4.7         | 5.3        | 5.3        | 4.4        | ***        | 97.6       | 95.6       | 98.8       | 99.5       |
| 35.3                    | 35.3                    | 34.6                    | 29.1                    | 0.5         | 2.30        | 1.00        | 1.00        | 4.5         | 0.8         | 1.3        | 0.8        | ***        | 95.9       | 97.8       | 99.3       | 95.6       | 96.4       |
| 36.5                    | 35.7                    | 35.8                    | 30.2                    | 0.8         | 3.10        | 0.80        | 0.80        | 5.3         | 0.5         | 1          | ***        | 99.3       | 95.1       | 97.1       | 99.0       | 94.9       | 95.6       |
| 35.3                    | 35.7                    | 34.2                    | 29.1                    | 0.8         | 3.10        | 0.80        | 0.80        | 5.3         | 0.5         | ***        | 99.0       | 98.8       | 95.1       | 97.1       | 98.5       | 94.9       | 95.6       |
| 35.7                    | 34.9                    | 35.0                    | 29.9                    | 0.3         | 2.60        | 0.30        | 0.30        | 4.7         | ***         | 99.5       | 99.5       | 99.3       | 95.6       | 97.6       | 99.0       | 95.4       | 96.1       |
| 34.9                    | 34.9                    | 34.2                    | 30.2                    | 4.5         | 3.70        | 5.00        | 4.50        | ***         | 95.6        | 95.1       | 95.1       | 95.9       | 99.0       | 97.6       | 95.6       | 99.8       | 99.5       |
| 35.3                    | 34.5                    | 34.6                    | 29.5                    | 0.5         | 2.3         | 0.5         | ***         | 95.9        | 99.8        | 99.3       | 99.3       | 99.0       | 95.9       | 97.8       | 99.3       | 95.6       | 96.4       |
| 35.7                    | 35.3                    | 35.4                    | 30.2                    | 0.5         | 2.9         | ***         | 99.5        | 95.4        | 99.8        | 99.3       | 99.3       | 99.0       | 95.4       | 97.3       | 98.8       | 95.1       | 95.9       |
| 35.7                    | 34.9                    | 33.4                    | 29.9                    | 2.3         | ***         | 97.3        | 97.8        | 96.6        | 97.6        | 97.1       | 97.1       | 97.8       | 96.6       | 97.6       | 97.6       | 96.4       | 97.1       |
| 35.3                    | 35.3                    | 34.6                    | 29.5                    | ***         | 97.8        | 99.5        | 99.5        | 95.9        | 99.8        | 99.3       | 99.3       | 99.5       | 95.9       | 97.8       | 98.8       | 95.6       | 96.4       |
| 33.8                    | 31.1                    | 19.9                    | ***                     | 75.2        | 75.0        | 74.8        | 75.2        | 74.8        | 75.0        | 75.5       | 74.8       | 75.5       | 75.0       | 76.0       | 75.2       | 74.8       | 75.2       |
| 33.5                    | 29.6                    | ***                     | 80.1                    | 69.2        | 69.9        | 68.7        | 69.2        | 69.4        | 68.9        | 69.4       | 68.4       | 69.2       | 69.2       | 69.9       | 68.9       | 69.4       | 69.7       |
| 20.8                    | ***                     | 72.8                    | 74.8                    | 71.1        | 71.4        | 71.1        | 71.6        | 71.4        | 71.4        | 70.9       | 70.9       | 71.1       | 71.4       | 72.6       | 71.4       | 71.4       | 71.8       |
| ***                     | 82.5                    | 70.4                    | 73.1                    | 71.1        | 70.9        | 70.9        | 71.1        | 71.4        | 70.9        | 71.1       | 70.4       | 71.1       | 71.4       | 72.3       | 70.9       | 71.1       | 71.8       |
| 70.6                    | 72.1                    | 68.7                    | 75.5                    | 93.2        | 92.5        | 92.7        | 93.2        | 92.2        | 93.0        | 92.5       | 92.5       | 93.2       | 91.7       | 93.2       | 93.0       | 92.2       | 92.2       |
| 71.8                    | 72.1                    | 68.9                    | 75.0                    | 93.2        | 92.2        | 93.0        | 93.2        | 91.0        | 93.0        | 92.5       | 92.5       | 93.2       | 91.0       | 92.7       | 93.0       | 90.8       | 91.5       |
| 71.1                    | 71.8                    | 72.6                    | 79.1                    | 73.1        | 73.3        | 73.1        | 73.5        | 73.8        | 73.3        | 73.8       | 73.3       | 73.5       | 73.3       | 74.5       | 73.8       | 73.8       | 73.8       |
| 70.9                    | 71.6                    | 72.3                    | 78.9                    | 72.8        | 73.1        | 72.8        | 73.3        | 73.5        | 73.1        | 73.5       | 73.1       | 73.3       | 73.1       | 74.3       | 73.5       | 73.5       | 73.5       |
| 70.6                    | 69.2                    | 68.0                    | 72.6                    | 71.1        | 71.1        | 71.4        | 71.6        | 70.6        | 71.4        | 71.8       | 70.9       | 71.1       | 70.6       | 70.9       | 71.4       | 70.4       | 71.1       |
| 70.6                    | 69.4                    | 68.9                    | 74.0                    | 71.6        | 71.6        | 71.4        | 71.1        | 70.6        | 71.4        | 71.8       | 71.1       | 71.8       | 70.6       | 70.9       | 71.1       | 70.6       | 71.1       |
| 69.7                    | 68.7                    | 67.5                    | 71.8                    | 70.4        | 70.9        | 70.6        | 70.9        | 69.9        | 70.6        | 71.1       | 70.4       | 70.6       | 69.9       | 70.1       | 70.9       | 69.7       | 70.4       |
| 52.7                    | 51.2                    | 51.2                    | 53.9                    | 55.8        | 55.8        | 56.1        | 56.3        | 54.4        | 56.1        | 56.3       | 55.6       | 55.8       | 54.6       | 55.8       | 56.3       | 54.1       | 54.6       |
| 52.4                    | 51.0                    | 51.0                    | 53.6                    | 55.6        | 55.6        | 55.8        | 56.1        | 54.1        | 55.8        | 56.1       | 55.3       | 55.6       | 54.4       | 55.6       | 56.1       | 53.9       | 54.4       |









|    |                        |     |     |
|----|------------------------|-----|-----|
| 39 | Pre_gdB_AEM04091<br>2  | 140 | 140 |
| 40 | Pre_gdB_FM20018<br>6.1 | 140 | 140 |
|    |                        | 140 | 140 |
|    |                        | 144 | 144 |
|    |                        | 144 | 144 |
|    |                        | 140 | 140 |
|    |                        | 140 | 140 |
|    |                        | 140 | 140 |
|    |                        | 140 | 140 |
|    |                        | 140 | 140 |
|    |                        | 144 | 144 |
|    |                        | 145 | 145 |
|    |                        | 145 | 145 |
|    |                        | 145 | 145 |
|    |                        | 141 | 141 |
|    |                        | 141 | 141 |
|    |                        | 145 | 145 |
|    |                        | 141 | 141 |
|    |                        | 145 | 145 |
|    |                        | 145 | 145 |
|    |                        | 141 | 141 |
|    |                        | 145 | 145 |
|    |                        | 141 | 141 |
|    |                        | 141 | 141 |
|    |                        | 141 | 141 |
|    |                        | 141 | 141 |
|    |                        | 148 | 148 |
|    |                        | 154 | 154 |
|    |                        | 151 | 151 |
|    |                        | 142 | 142 |
|    |                        | 141 | 141 |
|    |                        | 145 | 145 |
|    |                        | 144 | 144 |
|    |                        | 144 | 144 |
|    |                        | 161 | 161 |
|    |                        | 161 | 161 |
|    |                        | 167 | 167 |
|    |                        | 0   | *** |
|    |                        | *** | 100 |
